# Supplementary material for: Species Phylogeny versus Gene Trees: A Case Study of an Incongruent Data Matrix Based on Paphiopedilum Pfitz. (Orchidaceae)
Source: MDPI journal article supplement (doi:10.3390/ijms222111393), 2021-10-21
Supplement: s1 [file s1]

# SPECIES PHYLOGENY VERSUS GENE TREES: A CASE STUDY OF AN INCONGRUENT DATA MATRIX BASED ON *PAPHIOPEDILUM* PFITZ. (ORCHIDACEAE)

Marcin Górniak<sup>1\*</sup>, Dariusz L. Szlachetko<sup>2</sup>, Natalia Olędryńska<sup>2</sup>, Aleksandra M. Naczka<sup>1</sup>, Agata Mieszkowska<sup>1</sup>, Lidia Boss<sup>3</sup> and Marek S. Ziętara<sup>1</sup>

<sup>1</sup> Department of Evolutionary Genetics and Biosystematics, University of Gdansk, 80-309 Gdańsk, Poland; marcin.gorniak@ug.edu.pl (M.G.); aleksandra.naczka@ug.edu.pl (A.N.); agata.mieszkowska@ug.edu.pl (A.M.); marek.zietara@ug.edu.pl (M.Z.)

<sup>2</sup> Department of Plant Taxonomy and Nature Conservation, University of Gdańsk, 80-309 Gdańsk, Poland; dariusz.szlachetko@ug.edu.pl (D.S), natalia.oledrzynska@ug.edu.pl

<sup>3</sup> Department of Bacterial Molecular Genetics, University of Gdańsk, 80-309 Gdańsk, Poland; lidia.boss@ug.edu.pl

\* Correspondence: marcin.gorniak@ug.edu.pl

## Supplementary Data

**Table S1** MrModelTest results

| Data matrix    | model selected by MrModelTest | Data matrix       | model selected by MrModelTest |
|----------------|-------------------------------|-------------------|-------------------------------|
| <i>ACO</i>     | SYM+G                         | <i>matK</i>       | GTR+G                         |
| <i>DEF4</i>    | HKY+I                         | <i>rbcL</i>       | F81                           |
| <i>XDH</i>     | HKY+G                         | <i>ycf1</i>       | GTR+I+G                       |
| <i>LFY</i>     | GTR+I+G                       | <i>atpI-atpH</i>  | GTR+I                         |
| <i>RAD51</i>   | GTR+I                         | <i>trnS-trnfM</i> | HKY                           |
| <i>PHYC</i>    | HKY+G                         | <i>atpF-atpH</i>  | GTR+I                         |
| <i>XDH_2</i>   | HKY+G                         | <i>rpoC2</i>      | GTR+I                         |
| <i>LFY_2</i>   | GTR+I                         | <i>accD</i>       | GTR+I                         |
| <i>RAD51_2</i> | GTR+I                         |                   |                               |

**Table S2.** Sources of materials and GenBank accession numbers of taxa used in this study

|                             | Taxa                                                                                       | Sources/Vouchers | ycf1     | atpI-atpH | trnS-trnM | atpI-atpH | rpoC2    | accD     | rbcL     | ACO      | DEF4     | LFY      | RAD51    | Sources/Vouchers | PhyC      | Xdh       | matK      |
|-----------------------------|--------------------------------------------------------------------------------------------|------------------|----------|-----------|-----------|-----------|----------|----------|----------|----------|----------|----------|----------|------------------|-----------|-----------|-----------|
| Subg. <i>Parvissepalum</i>  | <i>P. armeniacum</i> S.C. Chen & F.Y. Liu                                                  | NOCC, 2471       | KP311895 | KP312208  | KP312321  | KP312560  | KP311896 | KP312095 | KP311796 | KP312432 | KP312873 | -        | KP312898 | 08/07P           | KX886238* | JQ660950  | JQ660908  |
|                             | <i>P. delavayi</i> G. Gussone                                                              | NOCC, 1951       | JQ182265 | KP312209  | KP312322  | KP312561  | JQ182229 | KP312096 | JQ182211 | KP312433 | KP312874 | -        | KP312900 | 29/06/S          | KX886239* | JQ660949  | JQ660905  |
|                             | <i>P. haughtianum</i> Perner & O. Gruss ( <i>Parvissepalum</i> 1)                          | NOCC, 2501       | KP311899 | -         | -         | -         | -        | -        | -        | -        | -        | -        | -        | -                | -         | -         | -         |
|                             | <i>P. micranthum</i> Tang & F.T. Wang ( <i>Parvissepalum</i> 1)                            | NOCC, 1919       | KP311898 | KP312212  | KP312325  | KP312564  | KP311899 | KP312099 | KP311799 | -        | KP312877 | -        | KP312903 | 70/06/P          | KX886237* | GU004514  | KX886268* |
| Subg. <i>Brachypetalum</i>  | <i>P. vietnamense</i> O. Gruss & Perner ( <i>Parvissepalum</i> 1)                          | NOCC, 2099       | -        | -         | -         | -         | -        | -        | -        | -        | -        | -        | -        | -                | -         | -         | -         |
|                             | <i>P. bellatulum</i> (Rohb.f.) Stein                                                       | NOCC             | JN181516 | KP312217  | KP312330  | KP312569  | JN181499 | KP312104 | JN181465 | JN181401 | KP312881 | JN181424 | KP312910 | 13/07/P          | KX886234* | KX886255* | KX886267* |
|                             | <i>P. canaliculatum</i> (Lindl. ex Bateman) Pfitzer in H.G.A. Engler & K.A.L. Pratt (eds.) | NOCC, 2511       | KP311704 | KP312220  | KP312333  | KP312572  | KP311905 | KP312107 | KP311805 | KP312441 | KP312884 | KP312788 | KP312915 | 25/07/C          | KX886236* | JQ660946  | JQ660902  |
|                             | <i>P. godefroyae</i> (God.-Leb.) Stein ( <i>Brachypetalum</i> 1)                           | NOCC, 4826       | -        | -         | -         | -         | -        | -        | -        | -        | -        | -        | -        | -                | -         | -         | -         |
| Subg. <i>Paphiopedilum</i>  | <i>P. niveum</i> (Rohb.f.) Stein ( <i>Brachypetalum</i> 1)                                 | NOCC, 6326       | KP311710 | KP312226  | KP312339  | KP312578  | KP311911 | KP312113 | KP311811 | KP312453 | KP312692 | -        | KP312922 | 78/08/P          | KX886235* | JQ660947  | JQ660903  |
|                             | <i>P. glaucodictum</i> (Blume) Stein ( <i>Corycypedium</i> 1)                              | NOCC, 6182       | KP311713 | KP312230  | KP312343  | KP312582  | KP311914 | KP312117 | KP311814 | KP312457 | KP312697 | KP312893 | KP312927 | -                | -         | -         | -         |
|                             | <i>P. kotokekingii</i> Foville                                                             | NOCC, 6321       | KP311714 | KP312231  | KP312344  | KP312583  | KP311915 | KP312118 | KP311815 | KP312458 | KP312699 | KP312904 | KP312929 | 62/06/P (c.96)   | KX886226* | KX886253* | KX886265* |
|                             | <i>P. ocellatum</i> ( <i>Corycypedium</i> 1)                                               | -                | -        | -         | -         | -         | -        | -        | -        | -        | -        | -        | -        | 79/05/P (c.2)    | KX886225* | KX886252* | KX886264* |
| Sect. <i>Corycypedium</i>   | <i>P. philippinense</i> (Rohb.f.) Stein ( <i>Corycypedium</i> 2)                           | NOCC, 2035       | KP311715 | KP312232  | KP312345  | KP312584  | KP311916 | KP312119 | KP311816 | KP312459 | KP312700 | KP312895 | KP312930 | 89/06/P (c.62)   | KX886232* | KX886254* | KX886266* |
|                             | <i>P. randsii</i> ( <i>Corycypedium</i> 2)                                                 | -                | -        | -         | -         | -         | -        | -        | -        | -        | -        | -        | -        | 93/06 (c.2)      | KX886227* | JQ660935  | JQ660888  |
|                             | <i>P. rothschildianum</i> (Rohb.f.) Stein                                                  | NOCC, 6071       | KP311718 | KP312235  | KP312348  | KP312587  | KP311919 | KP312122 | KP311819 | KP312463 | KP312703 | KP312813 | KP312933 | -                | -         | -         | -         |
|                             | <i>P. hayaldatum</i> (Rohb.f.) Stein                                                       | NOCC, 2014       | KP311724 | KP312242  | KP312355  | KP312594  | KP311925 | KP312129 | KP311825 | KP312469 | KP312709 | KP312821 | KP312940 | 49/06            | KX886224* | KX886251* | KX886263* |
| Sect. <i>Pardalopetalum</i> | <i>P. lowii</i> (Lindl.) Stein                                                             | NOCC, 4824       | KP311726 | KP312244  | KP312357  | KP312596  | KP311927 | KP312131 | KP311827 | -        | KP312711 | KP312825 | KP312942 | 66/08/P (c.52)   | KX886222* | JQ660936  | JQ660890  |
|                             | <i>P. parishii</i> (Rohb.f.) Stein                                                         | NOCC, 2628       | KP311727 | KP312245  | KP312358  | KP312597  | KP311928 | KP312132 | KP311828 | KP312472 | KP312712 | KP312826 | KP312944 | 82/06/P          | KX886223* | JQ660937  | JQ660891  |
|                             | <i>P. chamberlainianum</i> ( <i>Cochlopetalum</i> 1)                                       | -                | -        | -         | -         | -         | -        | -        | -        | -        | -        | -        | -        | 20/08/P          | KX886221* | JQ660938  | JQ660892  |
|                             | <i>P. victoria-regina</i> (Sander) M.W. Wood ( <i>Cochlopetalum</i> 1)                     | MBO, 921156-1    | KP311733 | KP312252  | KP312365  | KP312604  | KP311934 | KP312139 | KP311834 | KP312480 | KP312721 | KP312833 | KP312953 | -                | -         | -         | -         |
| Sect. <i>Paphiopedilum</i>  | <i>P. druryi</i> (Bedd.) Stein 1                                                           | MBO, 913218-1    | KP311739 | KP312258  | KP312371  | KP312610  | KP311940 | KP312145 | KP311840 | KP312488 | KP312727 | KP312792 | KP312963 | 32/06/K          | KX886220* | JQ660939  | JQ660894  |
|                             | <i>P. gratianum</i> Rolfe 1                                                                | NOCC, 3076       | KP311743 | KP312262  | KP312375  | KP312614  | KP311944 | KP312149 | KP311844 | KP312492 | KP312730 | KP312843 | KP312966 | 44/03/K          | KX886229* | JQ660944  | JQ660900  |
|                             | <i>P. transiensianum</i> O. Gruss & Perner                                                 | NOCC             | KP311757 | KP312277  | KP312389  | KP312629  | KP311957 | KP312164 | KP311858 | KP312514 | KP312746 | KP312852 | KP312969 | 11/07/P          | KX886233* | KX886250* | KX886262* |
|                             | <i>P. villosum</i> (Lindl.) Stein                                                          | MBO, 913228-1    | KP311758 | KP312278  | KP312390  | KP312630  | KP311958 | KP312165 | KP311859 | KP312515 | KP312748 | KP312856 | KP312967 | 11/09/P          | KX886216* | JQ660943  | JQ660899  |
| Sect. <i>Barbata</i>        | <i>P. barbatum</i> (Lindl.) Pfitzer                                                        | NOCC, 6320       | KP311761 | KP312281  | KP312393  | KP312633  | KP311960 | KP312168 | KP311862 | KP312519 | KP312750 | KP312856 | KP312969 | 11/08/P          | KX886215* | JQ660940  | JQ660895  |
|                             | <i>P. callosum</i> (Rohb.f.) Pfitzer                                                       | NOCC, 25191      | KP311763 | KP312283  | KP312395  | KP312635  | KP311962 | KP312170 | KP311864 | KP312523 | KP312752 | KP312859 | KP312969 | 17/06/P          | KX886217* | KX886246* | KX886258* |
|                             | <i>P. dayanum</i> (Lindl.) Stein                                                           | NOCC, 4629       | KP311766 | KP312286  | KP312396  | KP312636  | KP311965 | KP312173 | KP311867 | KP312526 | KP312755 | KP312863 | KP312966 | 28/06/P          | KX886219* | KX886245* | KX886257* |
|                             | <i>P. virens</i> var. <i>javanicum</i> (Reinw. ex Lindl.) Pfitzer ( <i>Barbata</i> 1)      | NOCC, 4629       | KP311766 | KP312286  | KP312396  | KP312636  | KP311965 | KP312173 | KP311867 | KP312526 | KP312755 | KP312863 | KP312966 | 12/10/5/P        | KX886214* | KX886244* | KX886256* |
| Sect. <i>Barbata</i>        | <i>P. javanicum</i> (Reinw. ex Lindl.) Pfitzer ( <i>Barbata</i> 1)                         | NOCC, 6318       | KP311769 | KP312289  | KP312400  | KP312641  | KP311967 | KP312176 | KP311869 | KP312528 | KP312756 | KP312865 | KP312968 | 88/06/P          | KX886218* | KX886247* | KX886259* |
|                             | <i>P. purpuratum</i> (Lindl.) Stein                                                        | NOCC, 1615       | KP311773 | KP312293  | KP312404  | KP312645  | KP311971 | KP312180 | KP311873 | KP312533 | KP312760 | KP312870 | KP312969 | -                | -         | -         | -         |
|                             | <i>Phragmipedium besseae</i>                                                               | -                | -        | -         | -         | -         | -        | -        | -        | -        | -        | -        | -        | 136/08/P         | KX886240* | JQ660951  | JQ660908  |
|                             | <i>Cypripedium dicksonianum</i>                                                            | -                | -        | -         | -         | -         | -        | -        | -        | -        | -        | -        | -        | Free Miller s.n. | KX886241* | JQ660952  | JQ660909  |
| Outgroup                    | <i>Mexipedium xerophyllum</i>                                                              | -                | -        | -         | -         | -         | -        | -        | -        | -        | -        | -        | -        | Popov s.n.       | KX886243* | GU004510  | JQ660907  |
|                             | <i>Selenipedium sequinociale</i>                                                           | -                | -        | -         | -         | -         | -        | -        | -        | -        | -        | -        | -        | 8261 Schachtel   | KX886242* | GU004507  | EF079360  |

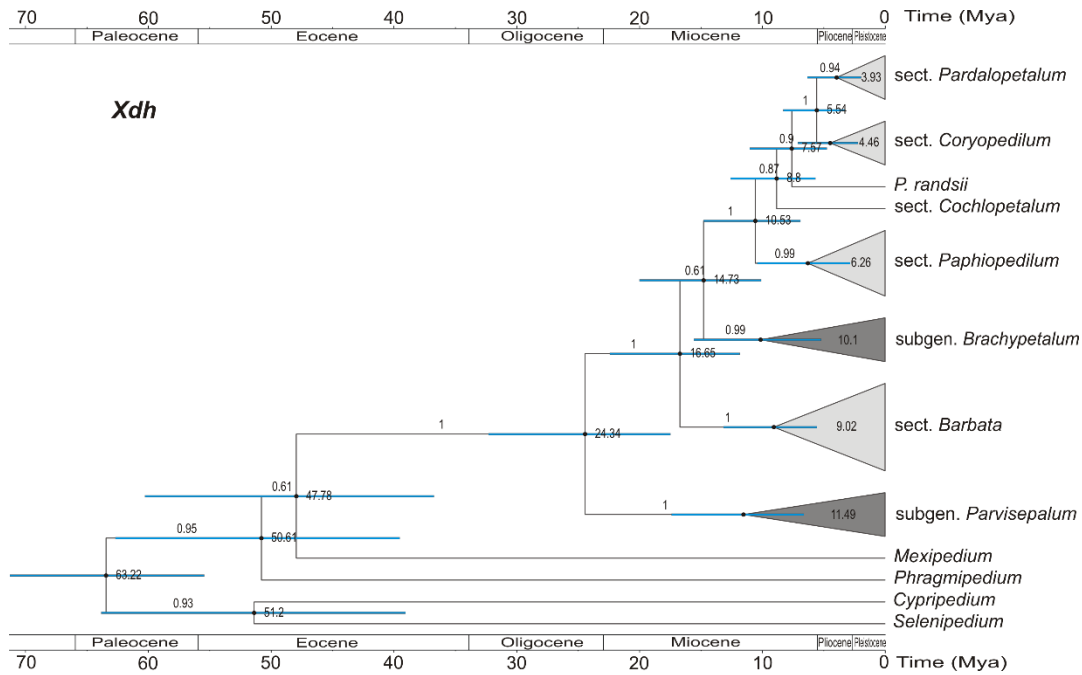

**Figure S1.** Time-calibrated tree of *Paphiopedilum* genus (maximum clade credibility tree) resulting from the BEAST analysis of the nuclear low copy gene *XDH*. Posterior Probability (PP) values are indicate above branches. Numbers at nodes are divergence times based on a strict clock analysis. Bars represent the 95% highest posterior credibility intervals of divergence times. Classification to clades follows Cribb (1998).

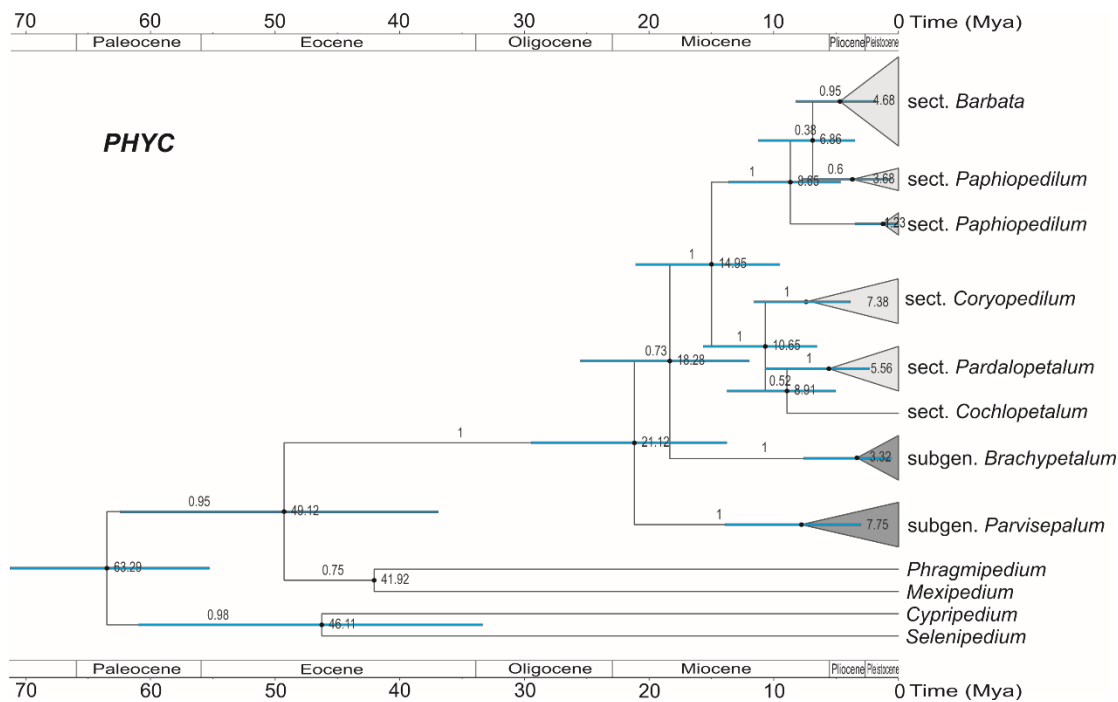

**Figure S2.** Time-calibrated tree of *Paphiopedilum* genus (maximum clade credibility tree) resulting from the BEAST analysis of the nuclear low copy gene *PHYC*. Posterior Probability (PP) values are indicate above branches. Numbers at nodes are divergence times based on a strict clock analysis. Bars represent the 95% highest posterior credibility intervals of divergence times. Classification to clades follows Cribb (1998).

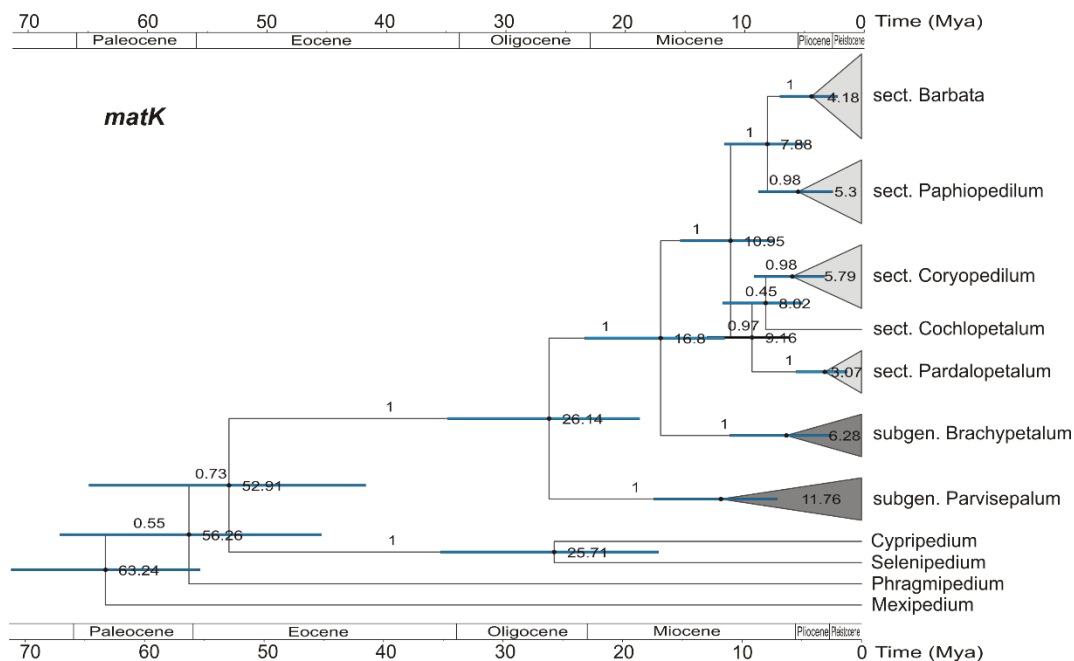

**Figure S3.** Time-calibrated tree of *Paphiopedilum* genus (maximum clade credibility tree) resulting from the BEAST analysis of the *matK* gene. Posterior Probability (PP) values are indicate above branches. Numbers at nodes are divergence times based on a strict clock analysis. Bars represent the 95% highest posterior credibility intervals of divergence times. Classification to clades follows Cribb (1998).

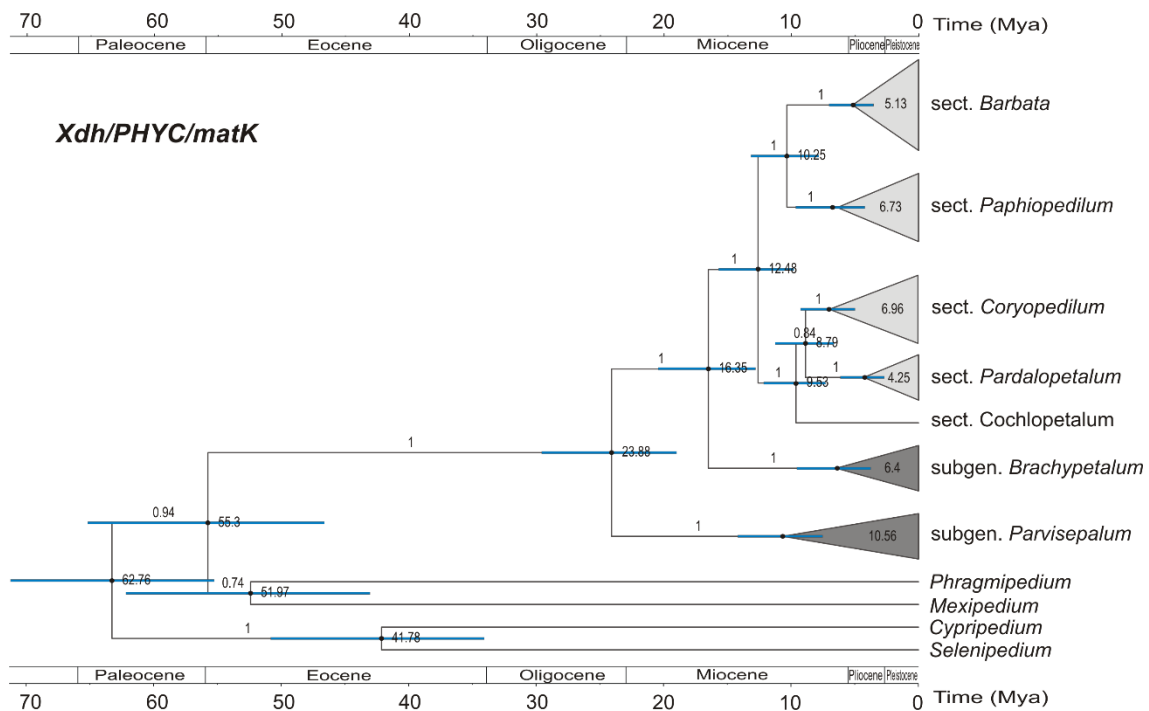

**Figure S4.** Time-calibrated tree of *Paphiopedilum* genus (maximum clade credibility tree) resulting from the BEAST analysis of the combined nuclear low copy gene *XDH*, *PHYC* and plastid *matK* gene. Posterior Probability (PP) values are indicate above branches. Numbers at nodes are divergence times based on a strict clock analysis. Bars represent the 95% highest posterior credibility intervals of divergence times. Classification to clades follows Cribb (1998).

## References

Cribb, P.J. *The Genus Paphiopedilum*. 2nd ed.; Natural History Publications (Borneo) in association with Royal Botanic Gardens: Kew, Kota Kinabalu, Sabah, Malaysia, 1998.
